# Supplementary material for: Deducing the functional characteristics of the human selenoprotein SELK from the structural properties of its intrinsically disordered C-terminal domain
Source: Royal Society of Chemistry journal article supplement (doi:10.1039/c5mb00679a), 2016-01-06
Supplement: c5mb00679a1.pdf [file c5mb00679a1.pdf]

|                          |                                                     |
|--------------------------|-----------------------------------------------------|
| <b>Property</b>          | 43-----51-----61-----71-----81-----91--             |
| <b>seq.</b>              | QQDVKKRRSYGNSSDSRYDDGRGPPGNPPRMGRINHLRGPSPPPMAGGCGR |
| <b>Aggrescan</b>         | -----X-----                                         |
| <b>Aggrescan 3D</b>      | -----X-----                                         |
| <b>Metamy1</b>           | -----                                               |
| <b>AMYPdb -&gt;Pafig</b> | -----XX-----                                        |
| <b>AMYPdb -&gt;Tango</b> | ---XXXXXXXXXX-----                                  |

**S1 Fig.** Prediction of the possible propensity to aggregate of the C-terminal domain of SELK by different tools: Aggrescan<sup>36</sup>; Aggrescan 3D<sup>37</sup>; Metamy1<sup>38</sup>; AMYPdb<sup>39</sup>; Pafig<sup>40</sup>; Tango<sup>41,42,43</sup>

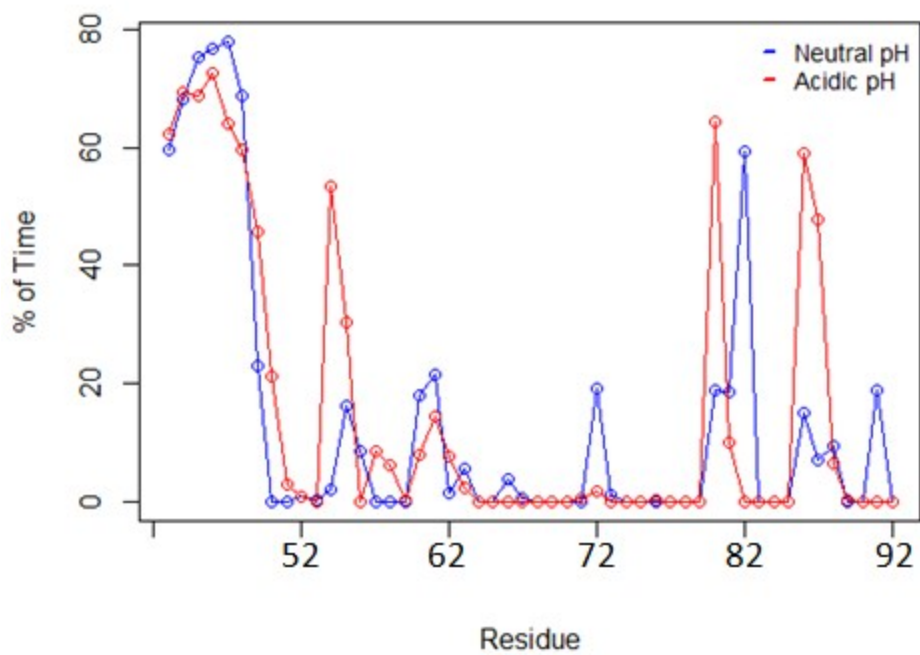

**S2 Fig.** Helicity evaluation. The figure reports the percentage of time in which each residue remains in helix during MD simulations at neutral (in blu) and acidic (in red) pH.

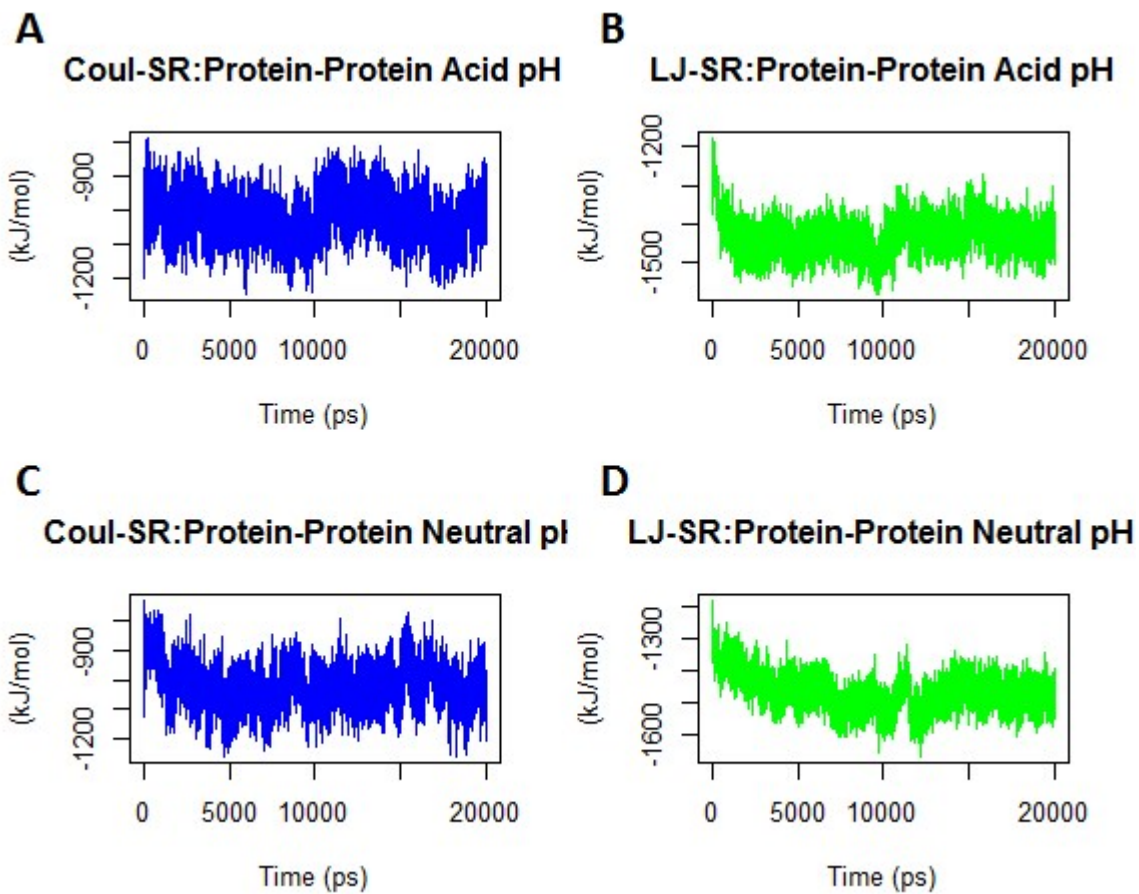

**S3 Fig.** Evaluation of Lennard Jones (LJ) and Coulomb potential during the MD simulation at neutral (A and B) and acidic pH (C and D).

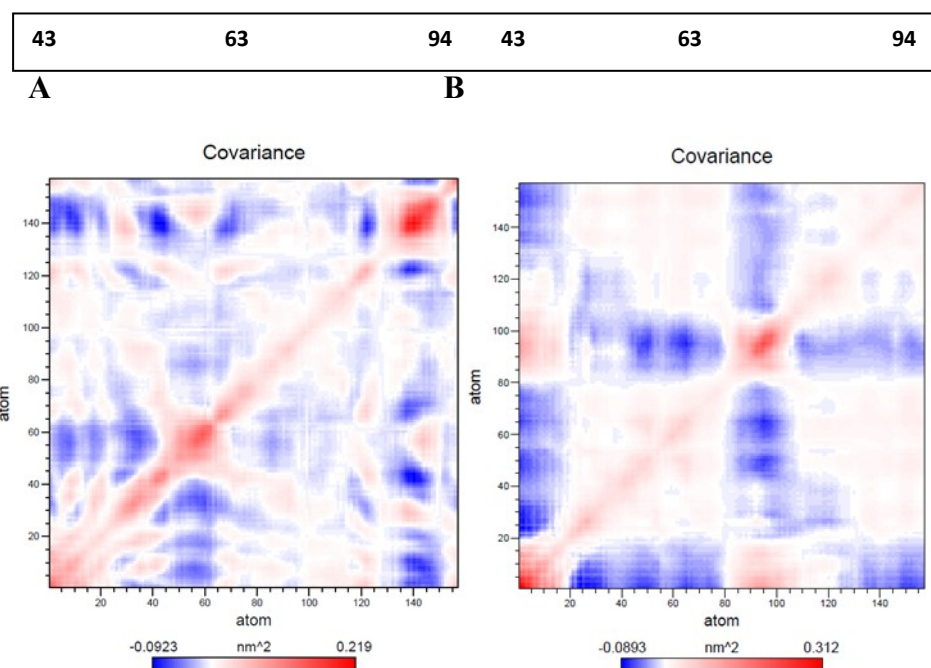

**S4 Fig.** Covariance matrix for the C-terminal domain of SELK during MD simulation at neutral (A) and acidic (B) pH

**S5 Fig.** Secondary structures for the C-terminal region of SELK during MD simulation at neutral (A) and acidic (B) pH where we indicate the residues in  $\alpha$ -helix,  $3_{10}$  helix and  $\beta$ -strand with H, G and E, and those in coil with “-“.

A

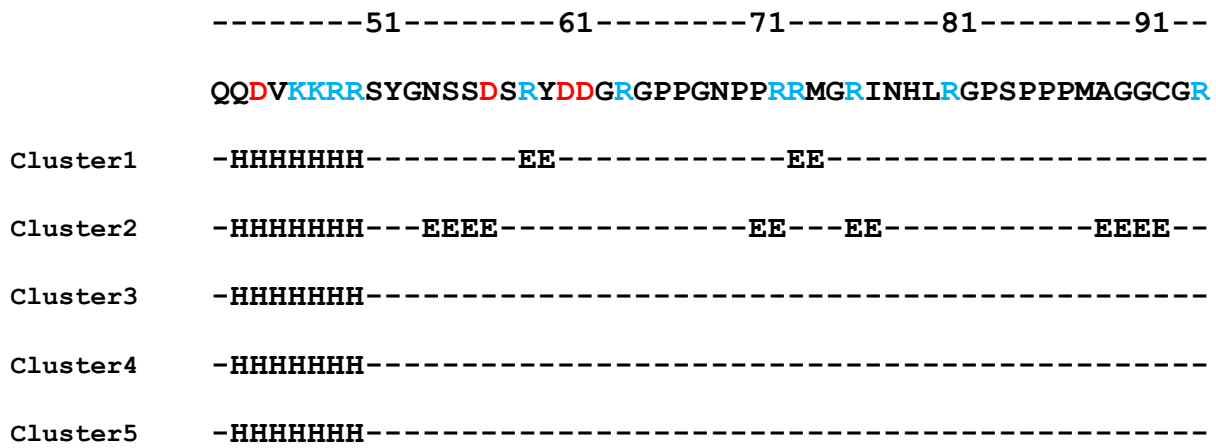

B

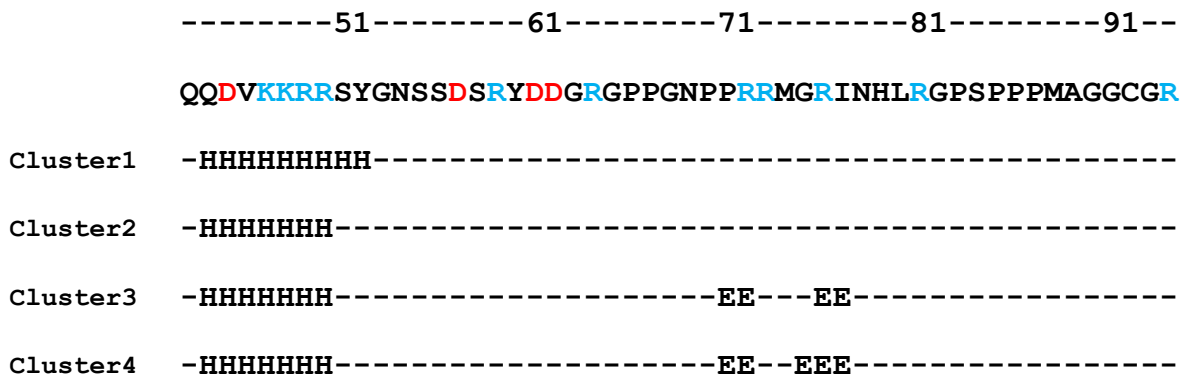

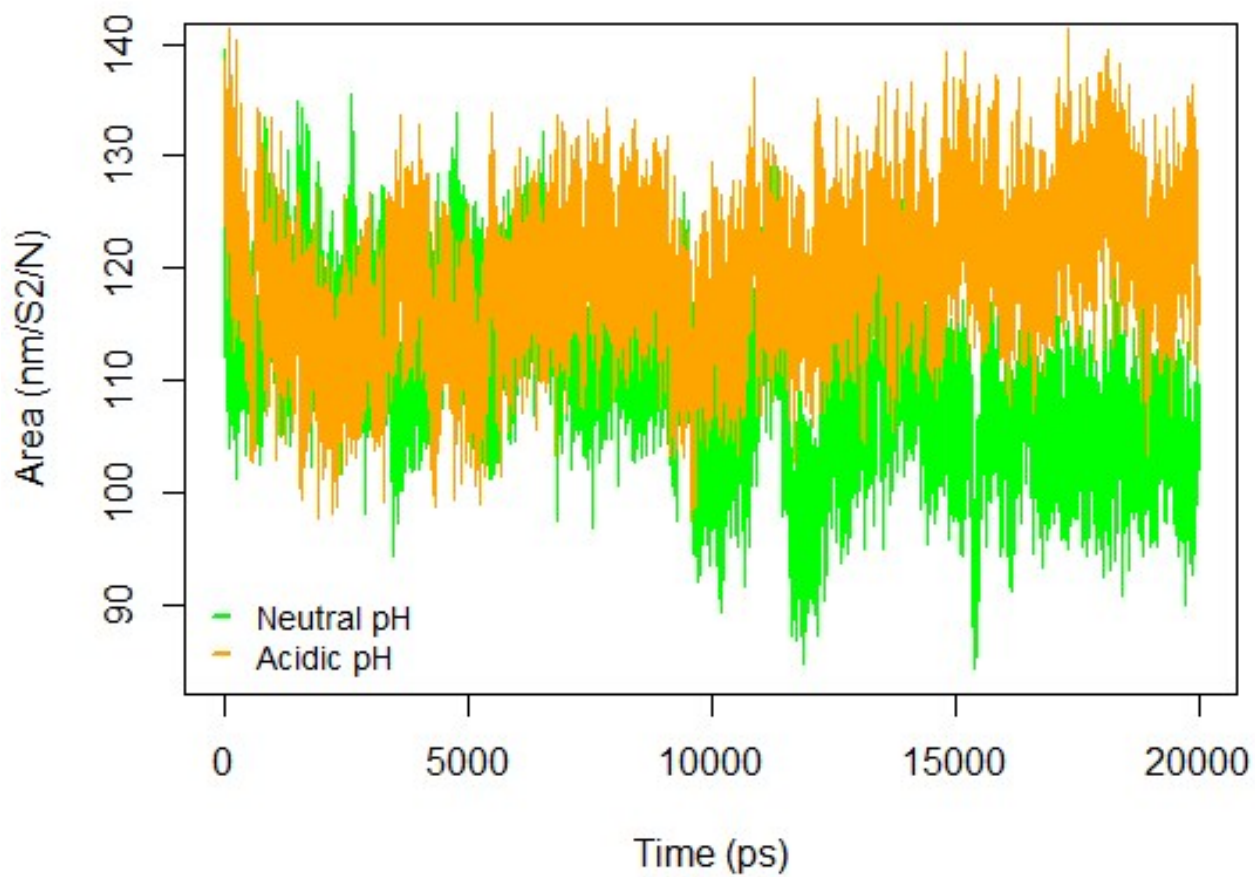

**S6 Fig.** Evaluation of the Solvent Accessible Area evaluated for the C-terminal domain of SELK during MD simulations at neutral and acidic pH.

A

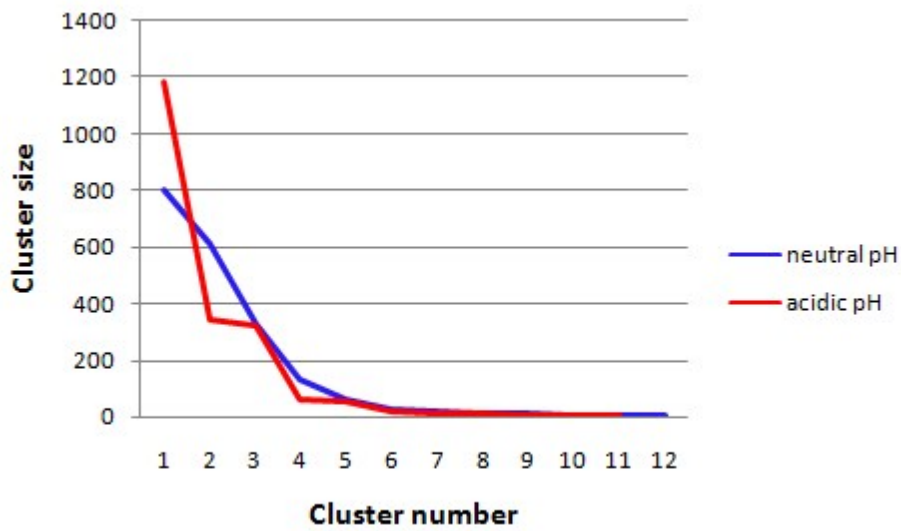

B

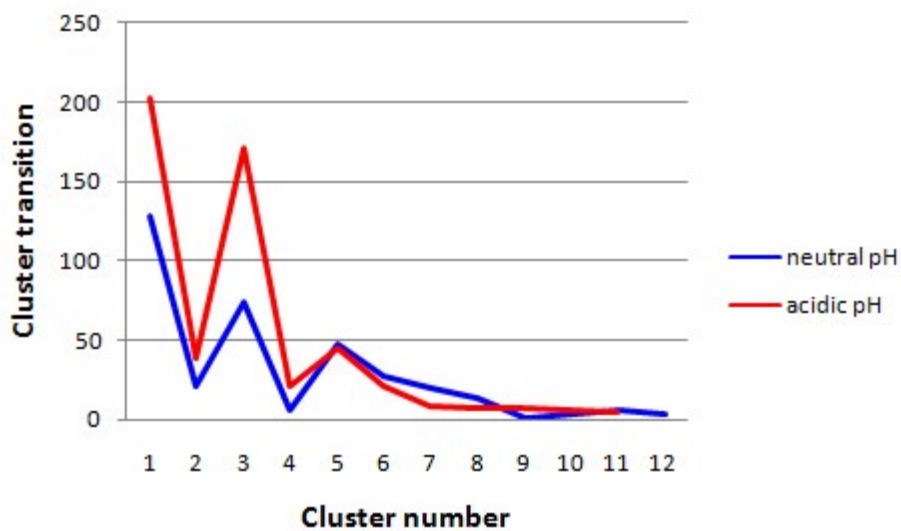

**S7 Fig.** Evaluation of cluster sizes in terms of conformation number (A) and frequency of transitions ( $1/ns$ ) (B) for the C-terminal domain of SELK during MD simulation at neutral (in blue) and acidic (in red) pH.

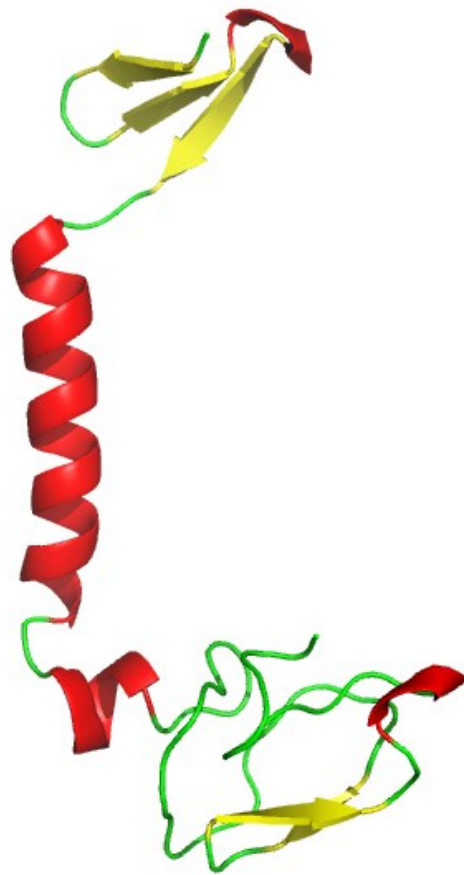

**S8 Fig.** The complete model obtained for SELK where we show structural details as helices and the  $\beta$ -strands in red and yellow, respectively



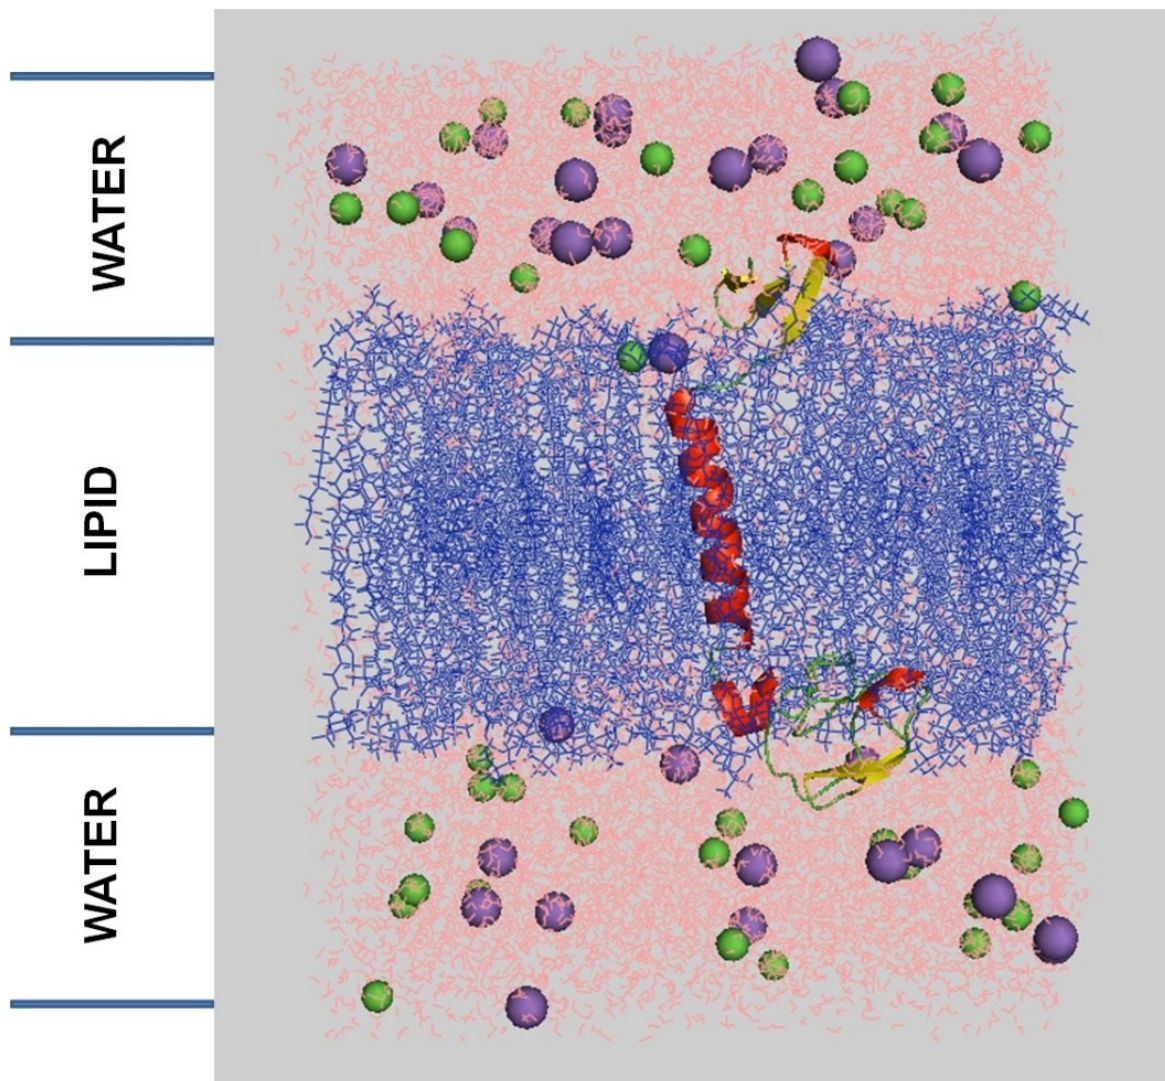

**9S Fig.** The complete model of SELK in membrane. POPC are shown as lines and colored in blue; the protein labeled as cartoon and colored by secondary structure elements with helices,  $\beta$ -strands and coils in red, yellow and green, respectively. The water molecules are depicted as lines and colored in salmon whereas two ions, Na<sup>+</sup> and Cl<sup>-</sup>, are shown by violet and green spheres.

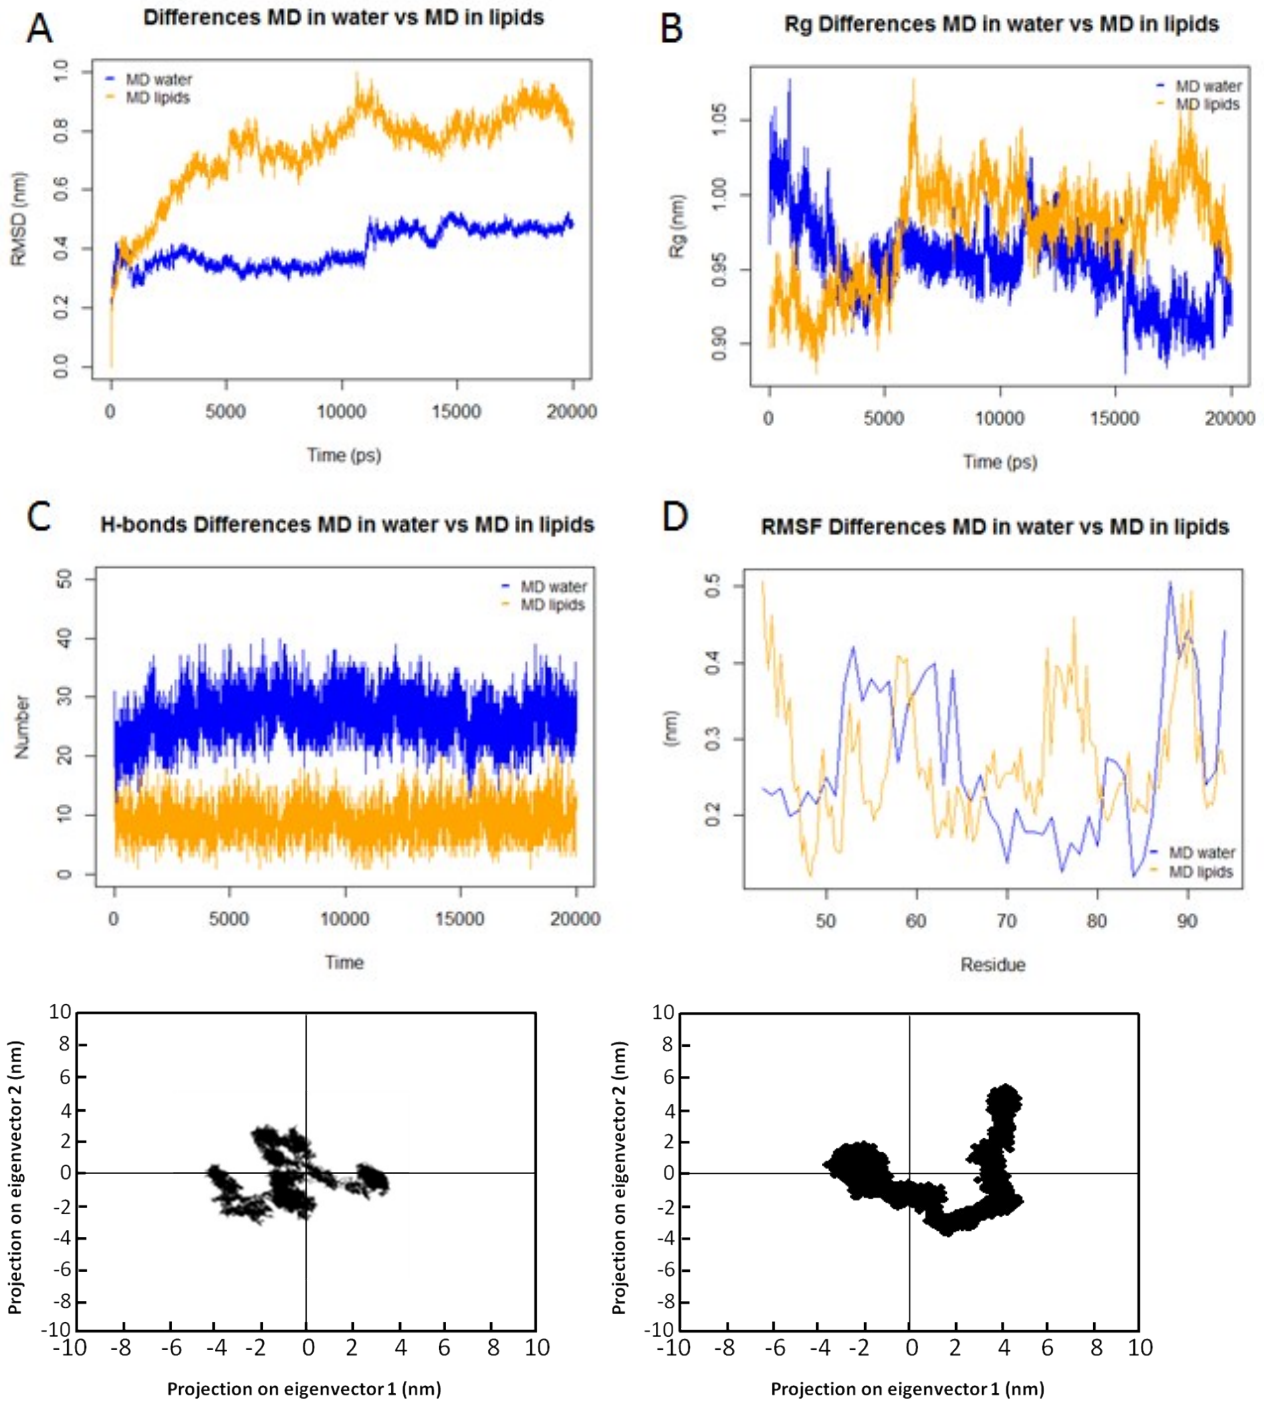

**S10 Fig.** A) RMSD plot, B Gyration Radius plot, C) H-bond plot, and D) RMSF plot for the C-terminal domain of SELK during MD simulations in water (in blue) and in lipids (in orange). Moreover, the projection plots for the C-terminal domain of SELK during MD simulations in water (E) and in lipids (F).

**A**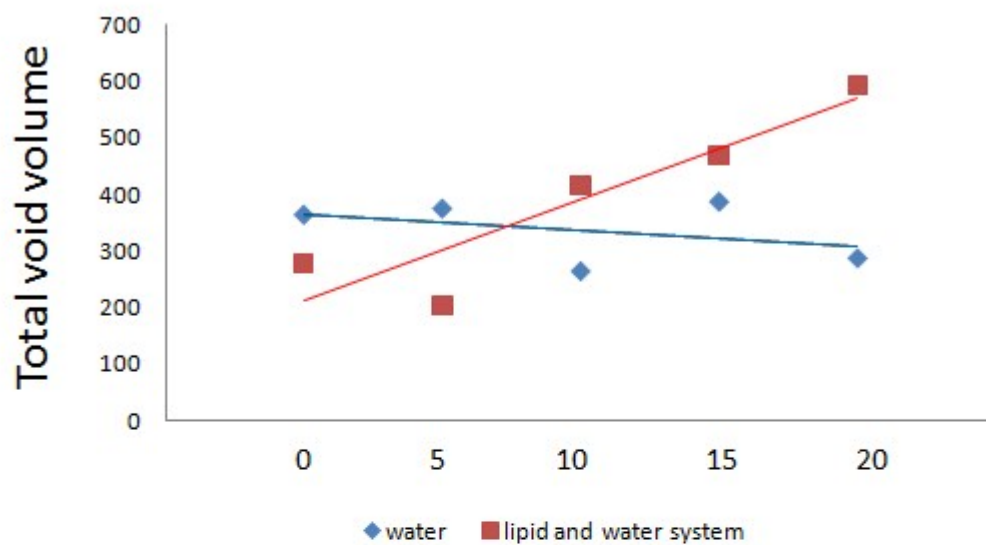**B**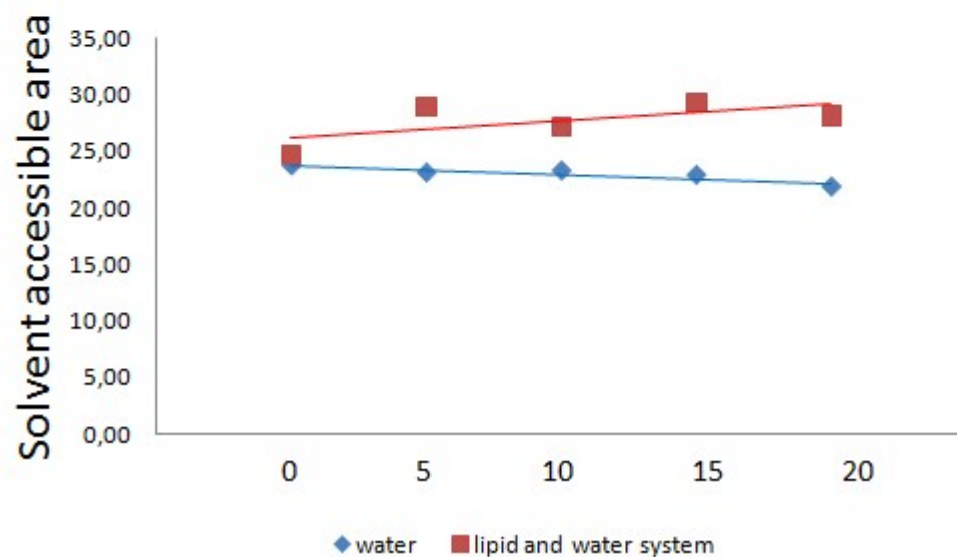

**S11 Fig.** Total void volume (A) and solvent accessible area (B) evaluated on the structure of the C-terminal domain of SELK free in water and in lipid and water system after 0, 5, 10, 15 and 20 ns of MD simulation.

A

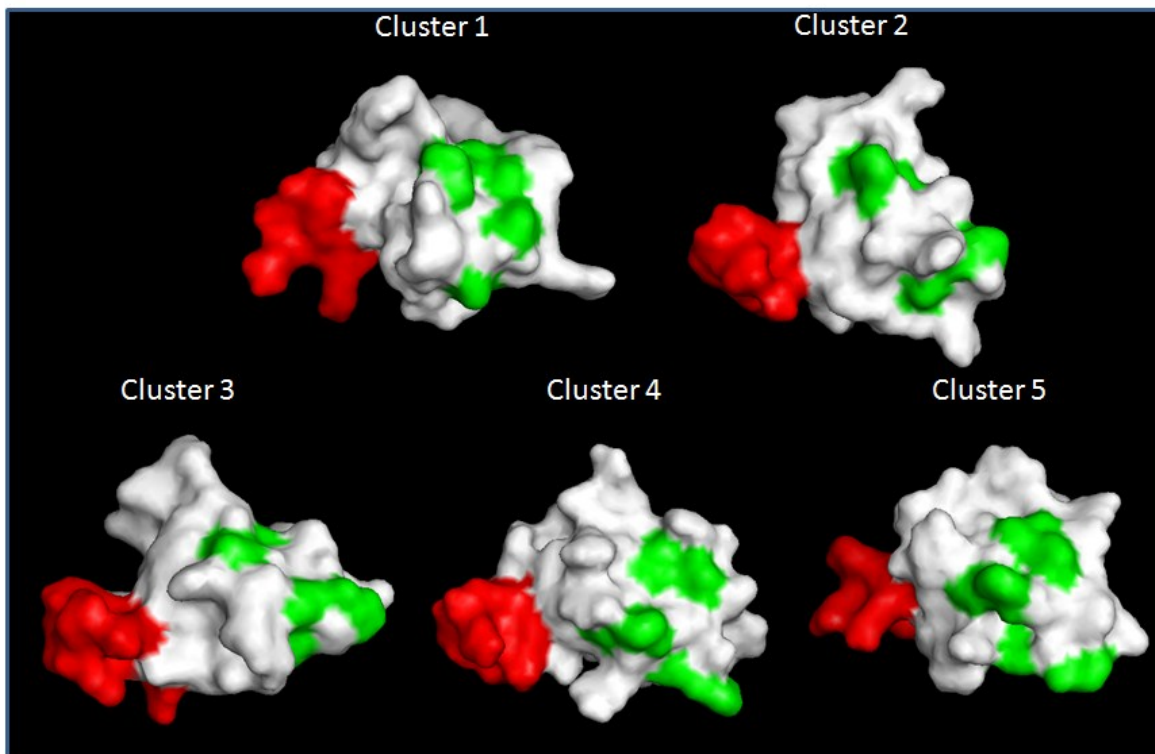

B

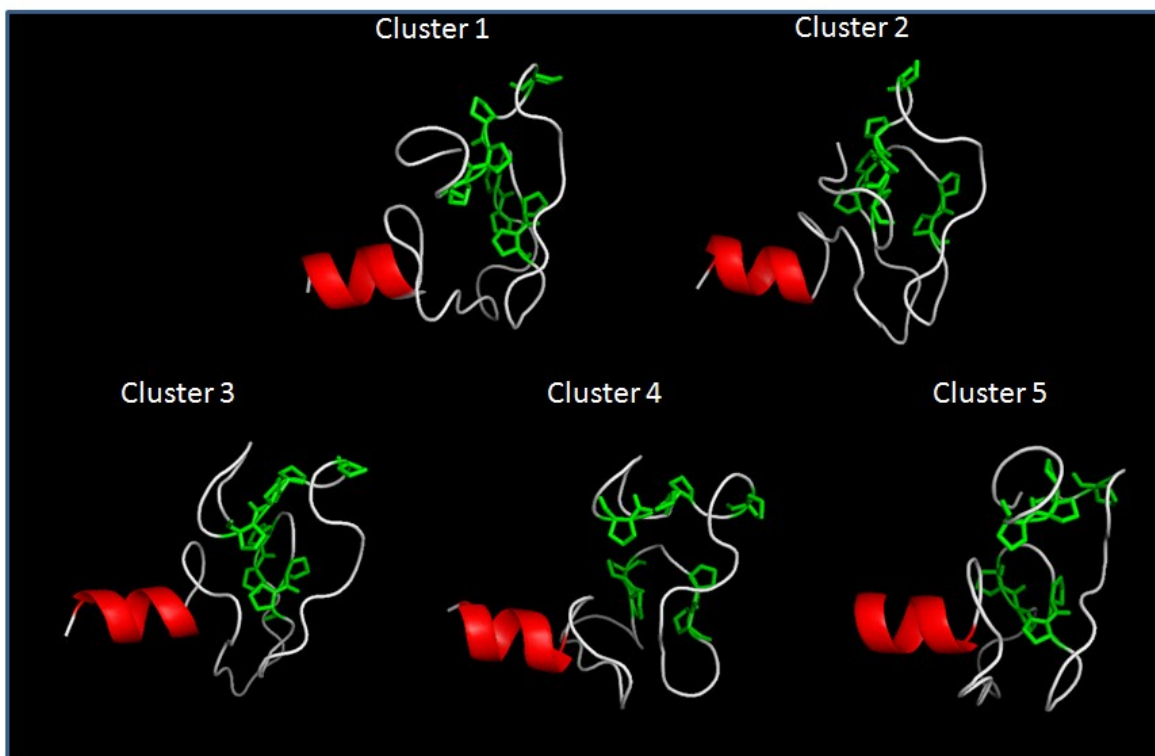

**S12 Fig.** Representations of five clusters by surface (A) and ribbon (B) representations where we report the helix region and the prolines in red and green, respectively.

**S1 Table.** Total number of H-bonds involving the charged residues between them (R\_charged) and with water molecules (SOLV.) at neutral (A) and acidic (B) pH.

A

|        | Specific H-Bonds Charged Residues Neutral pH |            |       |            |       |            |       |            |       |            |
|--------|----------------------------------------------|------------|-------|------------|-------|------------|-------|------------|-------|------------|
|        | 0ns                                          |            | 5ns   |            | 10ns  |            | 15ns  |            | 20ns  |            |
|        | SOLV.                                        | R. Charged | SOLV. | R. Charged | SOLV. | R. Charged | SOLV. | R. Charged | SOLV. | R. Charged |
| 45 ASP | 8                                            | 2          | 5     | 1          | 7     | 1          | 7     | 1          | 6     | 1          |
| 47 LYS | 2                                            | 1          | 3     | 0          | 2     | 1          | 2     | 0          | 2     | 0          |
| 48 LYS | 7                                            | 0          | 3     | 0          | 3     | 0          | 4     | 0          | 3     | 0          |
| 49 ARG | 5                                            | 2          | 3     | 1          | 2     | 1          | 4     | 1          | 5     | 1          |
| 50 ARG | 4                                            | 1          | 3     | 1          | 4     | 1          | 7     | 0          | 5     | 1          |
| 57 ASP | 4                                            | 3          | 7     | 0          | 9     | 0          | 7     | 0          | 8     | 0          |
| 59 ARG | 5                                            | 3          | 7     | 1          | 5     | 1          | 9     | 0          | 8     | 1          |
| 61 ASP | 2                                            | 2          | 10    | 0          | 9     | 0          | 9     | 0          | 6     | 2          |
| 62 ASP | 5                                            | 1          | 7     | 1          | 6     | 0          | 7     | 1          | 6     | 2          |
| 64 ARG | 6                                            | 1          | 8     | 0          | 8     | 0          | 6     | 1          | 4     | 2          |
| 72 ARG | 3                                            | 0          | 1     | 2          | 4     | 1          | 4     | 2          | 3     | 2          |
| 73 ARG | 6                                            | 1          | 3     | 1          | 5     | 0          | 8     | 0          | 3     | 1          |
| 76 ARG | 4                                            | 0          | 4     | 1          | 6     | 1          | 4     | 1          | 2     | 0          |
| 81 ARG | 5                                            | 0          | 5     | 0          | 8     | 0          | 8     | 0          | 9     | 0          |
| 94 ARG | 7                                            | 0          | 4     | 0          | 5     | 0          | 2     | 0          | 6     | 0          |

B

|        | Specific H-Bonds Charged Residues Acidic pH |            |       |            |       |            |       |            |       |            |
|--------|---------------------------------------------|------------|-------|------------|-------|------------|-------|------------|-------|------------|
|        | 0ns                                         |            | 5ns   |            | 10ns  |            | 15ns  |            | 20ns  |            |
|        | SOLV.                                       | R. Charged | SOLV. | R. Charged | SOLV. | R. Charged | SOLV. | R. Charged | SOLV. | R. Charged |
| 45 ASP | 6                                           | 1          | 4     | 0          | 4     | 0          | 7     | 2          | 6     | 1          |
| 47 LYS | 3                                           | 1          | 3     | 0          | 4     | 0          | 2     | 0          | 2     | 0          |
| 48 LYS | 6                                           | 0          | 4     | 0          | 6     | 0          | 5     | 1          | 5     | 0          |
| 49 ARG | 4                                           | 1          | 3     | 1          | 1     | 3          | 8     | 1          | 7     | 1          |
| 50 ARG | 3                                           | 1          | 6     | 0          | 1     | 1          | 4     | 2          | 6     | 1          |
| 57 ASP | 6                                           | 2          | 6     | 1          | 7     | 2          | 5     | 1          | 4     | 1          |
| 59 ARG | 4                                           | 1          | 4     | 2          | 5     | 2          | 2     | 2          | 6     | 1          |
| 61 ASP | 2                                           | 2          | 9     | 1          | 7     | 1          | 5     | 0          | 8     | 1          |
| 62 ASP | 11                                          | 1          | 9     | 1          | 13    | 0          | 10    | 1          | 6     | 0          |
| 64 ARG | 7                                           | 0          | 7     | 0          | 6     | 0          | 9     | 0          | 8     | 0          |
| 72 ARG | 5                                           | 0          | 5     | 1          | 7     | 1          | 3     | 1          | 7     | 1          |
| 73 ARG | 8                                           | 1          | 6     | 1          | 3     | 1          | 6     | 0          | 6     | 0          |
| 76 ARG | 2                                           | 0          | 4     | 2          | 4     | 2          | 3     | 1          | 6     | 1          |
| 81 ARG | 5                                           | 0          | 7     | 0          | 7     | 0          | 7     | 0          | 8     | 0          |
| 94 ARG | 2                                           | 0          | 5     | 0          | 5     | 0          | 6     | 0          | 6     | 0          |

**S2 Table.** Total number of H-bonds between HUB residues and the rest of the C-terminal region during MD simulation at neutral (A) and acidic (B) pH.

A)

| <b>HUB</b>    | <b>0 ns</b> | <b>5 ns</b> | <b>10 ns</b> | <b>15 ns</b> | <b>20 ns</b> |
|---------------|-------------|-------------|--------------|--------------|--------------|
| <b>69_ASN</b> | 1           | 3           | 2            | 3            | 3            |
| <b>87_PRO</b> | 0           | 0           | 0            | 1            | 1            |
| <b>60_TYR</b> | 2           | 2           | 2            | 1            | 2            |
| <b>71_PRO</b> | 0           | 0           | 0            | 0            | 0            |
| <b>55_SER</b> | 1           | 1           | 2            | 0            | 1            |

B)

| <b>HUB</b>    | <b>0 ns</b> | <b>5 ns</b> | <b>10 ns</b> | <b>15 ns</b> | <b>20 ns</b> |
|---------------|-------------|-------------|--------------|--------------|--------------|
| <b>60_TYR</b> | 2           | 2           | 3            | 1            | 4            |
| <b>52_TYR</b> | 1           | 1           | 2            | 1            | 3            |
| <b>79_HIS</b> | 0           | 2           | 1            | 2            | 1            |
| <b>94_ARG</b> | 0           | 1           | 2            | 0            | 1            |
| <b>87_PRO</b> | 0           | 1           | 2            | 1            | 2            |

**S3 Table.** ASA evaluation for HUB Residues during MD simulation at neutral (A) and acidic (B) pH.

A)

| <b>HUB</b>    | <b>0 ns</b> | <b>5 ns</b> | <b>10 ns</b> | <b>15 ns</b> | <b>20 ns</b> |
|---------------|-------------|-------------|--------------|--------------|--------------|
| <b>69_ASN</b> | 0.000000    | 0.000000    | 0.000000     | 0.006830     | 0.006830     |
| <b>87_PRO</b> | 0.063423    | 0.056376    | 0.133893     | 0.000000     | 0.000000     |
| <b>60_TYR</b> | 0.065506    | 0.196518    | 0.065506     | 0.042111     | 0.135691     |
| <b>71_PRO</b> | 0.253692    | 0.014094    | 0.042282     | 0.211410     | 0.422820     |
| <b>55_SER</b> | 0.827604    | 0.034128    | 0.051192     | 0.017064     | 0.000000     |

B)

| <b>HUB</b>    | <b>0 ns</b> | <b>5 ns</b> | <b>10 ns</b> | <b>15 ns</b> | <b>20 ns</b> |
|---------------|-------------|-------------|--------------|--------------|--------------|
| <b>60_TYR</b> | 0.084222    | 0.004679    | 0.056148     | 0.088901     | 0.018716     |
| <b>52_TYR</b> | 0.196518    | 0.510011    | 0.664418     | 0.435147     | 0.154407     |
| <b>79_HIS</b> | 0.703616    | 0.126431    | 0.120934     | 0.159413     | 0.142922     |
| <b>94_ARG</b> | 0.829540    | 0.515188    | 0.414770     | 0.611240     | 0.519554     |
| <b>87_PRO</b> | 0.035235    | 0.077517    | 0.105705     | 0.140940     | 0.112752     |

**S4 Table.** Comparison between the MD simulations conducted at neutral pH on the C-terminal domain of SELK and various globular proteins of similar length. We report the protein name, PDB codes, protein class, number of clusters using a cut-off = 0.25 and 0.15 nm, the final RMSD value (nm), the mean number of H-bonds, and the final Rg values (nm).

| Protein                                             | PDB code | Protein class | number of clusters using a cut-off of 0.25 nm | number of clusters using a cut-off of 0.15 nm | Final RMSD value (nm) | Mean number of H-bonds | Final Rg value (nm) |
|-----------------------------------------------------|----------|---------------|-----------------------------------------------|-----------------------------------------------|-----------------------|------------------------|---------------------|
| <b>C-terminal domain of SELK</b>                    |          | IDP           | 12                                            | 47                                            | 0.5                   | 28                     | 0.95                |
| Kappa-scoloptoxin-Ssm1a                             | 2M35     | alpha         | 3                                             | 8                                             | 0.19                  | 37                     | 0.93                |
| Pheromone en-1                                      | 2NSV     | alpha         | 0                                             | 2                                             | 0.3                   | 41                     | 0.97                |
| Antifungal protein from aspergillus giganteus       | 1AFP     | beta          | 0                                             | 9                                             | 0.3                   | 35                     | 0.88                |
| Antifungal protein paf from penicillium chrysogenum | 2KCN     | beta          | 5                                             | 26                                            | 0.42                  | 35                     | 1                   |
| Brazzein                                            | 2LY5     | alpha-beta    | 3                                             | 15                                            | 0.18                  | 34                     | 0.99                |
| Defensin-like protein 1                             | 2N2Q     | alpha-beta    | 2                                             | 11                                            | 0.29                  | 38                     | 1                   |
